# Supplementary material for: A sensitive paper-based sensor for fluoride detection in water using Tb3+ photoluminescence
Source: Royal Society of Chemistry journal article supplement (doi:10.1039/d4sd00078a), 2024-01-01
Supplement: d4sd00078a1.pdf [file d4sd00078a1.pdf]

# **A sensitive paper-based sensor for fluoride detection in water using Tb<sup>3+</sup> photoluminescence**

Pankaj Kumar Chaturvedi and Uday Maitra\*

Department of Organic Chemistry, Indian Institute of Science, Bengaluru, Karnataka 560012, India

\*Email: [maitra@iisc.ac.in](mailto:maitra@iisc.ac.in)

## **Content**

- S1. Optimization of assay conditions (temperature, time, solvents, pH)**
- S2. Reactivity of fluoride ions towards *pro*-sensitizers 4 versus 2**
- S3. Comparison of PL intensity and HPLC peak area with incubation time**
- S4. Calculation of LOD and comparison table with reported literature**
- S5. Fluoride detection from real-life samples and calculations**
- S6. %Recovery calculations from spike and recovery test**
- S7. <sup>1</sup>H NMR, <sup>13</sup>C NMR and HRMS spectra of 2, 3 and 4**
- S8. References**

### S1. Optimization of assay conditions:

**Incubation temperature.** For the optimization of incubation temperature, three identical samples (450  $\mu\text{L}$ ) of fluoride-treated (333  $\mu\text{M}$ ) **2**-doped (333  $\mu\text{M}$ ) NaCh (20 mM) solution along with a control (without fluoride) were incubated at various temperatures (30, 35, and 40  $^{\circ}\text{C}$ ) for 1 h. Then, these solutions were mixed with 150  $\mu\text{L}$  of aqueous terbium nitrate (20 mM) and converted to gels as described earlier. The  $\text{Tb}^{3+}$  luminescence of these samples was recorded at 545 nm ( $\lambda_{\text{ex}}$  336 nm). The luminescence enhancement for the sample incubated at 35  $^{\circ}\text{C}$  compared to the control was the highest, suggesting the complete release of sensitizer (**1**). The luminescence enhancement at 40  $^{\circ}\text{C}$  was similar to that at 35  $^{\circ}\text{C}$ ; the control also showed some luminescence enhancement, suggesting the decomposition of **2** at the higher temperature (**Fig. S1**). Therefore, the incubation temperature for the fluoride detection assay for all subsequent measurements was kept at 35  $^{\circ}\text{C}$ .

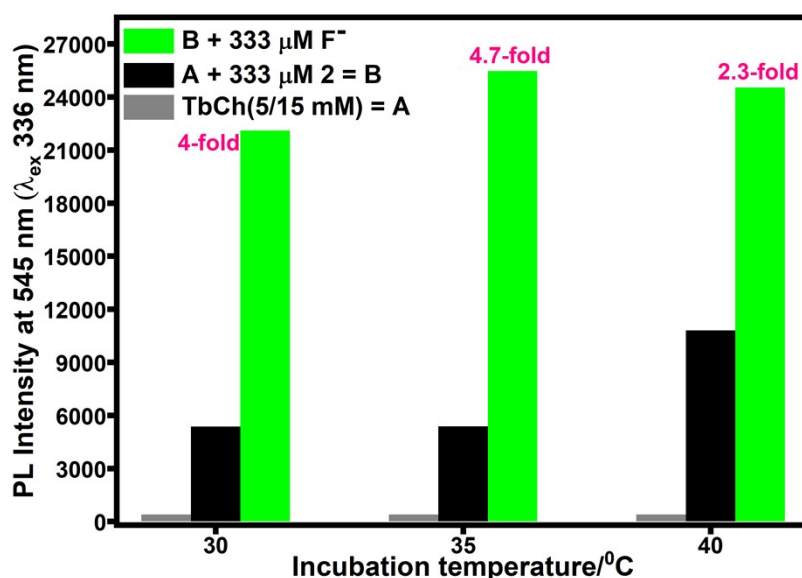

**Figure S1.** PL intensity at 545 nm ( $\lambda_{\text{ex}}$  336 nm) of TbCh gels prepared from the preincubated samples of undoped, **2**-doped, and fluoride-treated **2**-doped 20 mM NaCh solution (33% organic solvent/water, v/v).

**Incubation time.** To optimize the incubation time, solutions (1 mL) of **1** (333  $\mu\text{M}$ )-doped NaCh (20 mM), **2** (333  $\mu\text{M}$ )-doped NaCh (20 mM), and fluoride (333  $\mu\text{M}$ )-treated **2** (333  $\mu\text{M}$ )-doped NaCh (20 mM) were incubated at 35  $^{\circ}\text{C}$ . At 30 and 60 minutes, 450  $\mu\text{L}$  aliquots of each sample were taken out and mixed with 150  $\mu\text{L}$  of aqueous terbium nitrate (20 mM) and converted to gels as described earlier. The time-delayed  $\text{Tb}^{3+}$  luminescence of these gels was recorded at 545 nm as before. As shown in **Fig. S2**, a similar PL intensity for fluoride (333  $\mu\text{M}$ )-treated, **2** (333  $\mu\text{M}$ )-doped TbCh gel compared to **1** (333  $\mu\text{M}$ )-doped TbCh gel, suggesting that the incubation of 30 min was sufficient to convert all the *pro*-sensitizer **2** to sensitizer **1** in the presence of fluoride.

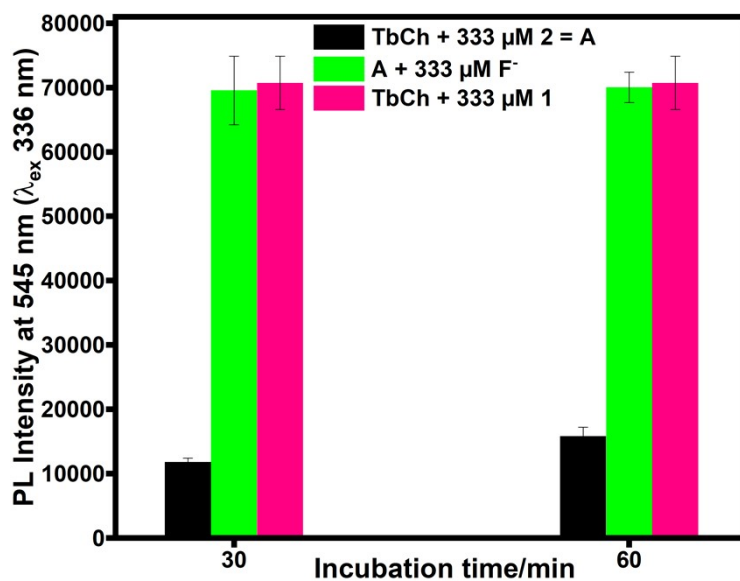

**Figure S2.** PL intensity at 545 nm ( $\lambda_{ex}$  336 nm) of TbCh gels prepared from the preincubated samples of 2-doped, fluoride-treated 2-doped, and 1-doped 20 mM NaCh solution (33% organic solvent/water, v/v).

**Organic solvent in assay media.** For the optimization of organic solvent in the assay media, stock solutions (1 mM) of *pro*-sensitizer **2** were prepared in three different dipolar aprotic organic solvents (DMF, ACN, DMSO) and further diluted in 30 mM NaCh solution. These solutions (450  $\mu$ L) were incubated at 35  $^{\circ}$ C with and without fluoride for 30 min, mixed with aqueous terbium nitrate solution (150  $\mu$ L), and sonicated to make TbCh (5/15 mM) gel. The Tb<sup>3+</sup> luminescence of these samples was measured at 545 nm as usual (**Fig. S3**). These data suggested 33% DMSO/water (v/v) to be a better solvent system for the fluoride detection assay.

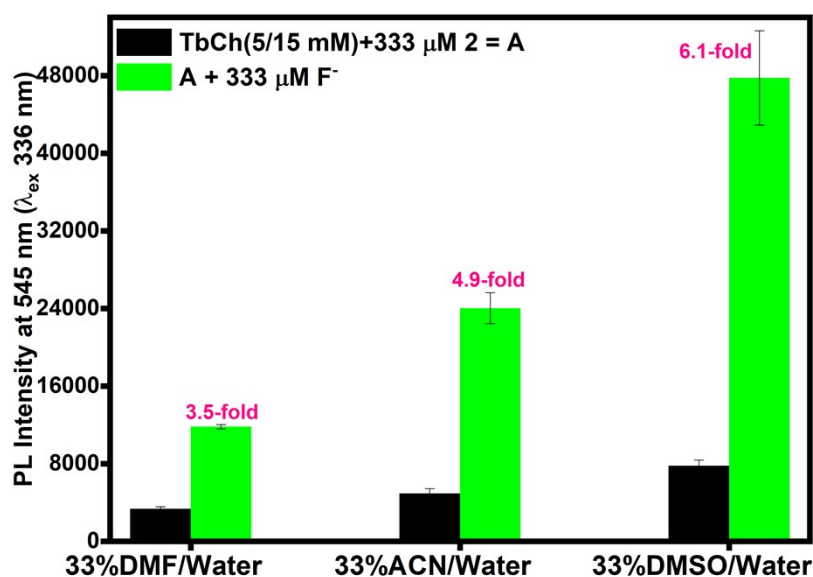

**Figure S3.** PL intensity at 545 nm ( $\lambda_{ex}$  336 nm) of TbCh gels prepared from the preincubated 2-doped and fluoride-treated 2-doped NaCh solutions (33% organic solvent/water, v/v).

**Percentage of DMSO in aqueous media.** Next, sets of 2-doped (control) and fluoride-treated 2-doped NaCh solutions with varying %DMSO/water (*v/v*) were incubated at 35 °C for 30 min and converted to TbCh gels, followed by PL intensity measurements at 545 nm ( $\lambda_{\text{ex}}$  336 nm) as described earlier. These data suggested that 20% DMSO/water (*v/v*) was a better solvent system for the working concentrations of *pro*-sensitizer **2** for the fluoride detection assay (**Fig. S4a and S4b**).

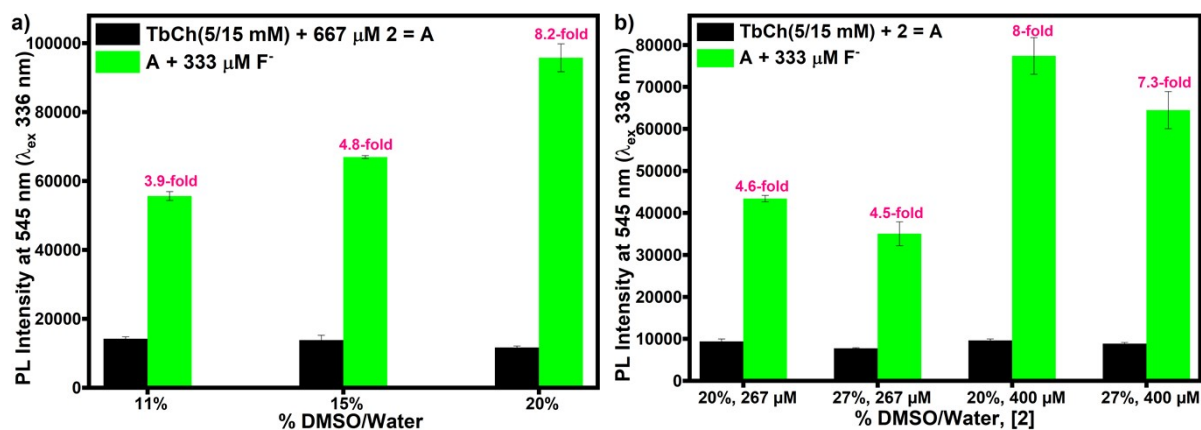

**Figure S4.** PL intensity at 545 nm of TbCh gels prepared from the preincubated 2-doped and fluoride-treated 2-doped NaCh solutions varying **a)** %DMSO/water 667  $\mu\text{M}$  of **2** and **b)** %DMSO/water for 267 and 400  $\mu\text{M}$  of **2**.

**Optimization of pH of the assay solvent.** The introduction of the buffer (pH  $\sim$  7) was necessary to avoid any pH variation of the assay conditions by adding analytes/interferents because the *pro*-sensitizer **2** was hydrolyzed to **1** at pH  $>$  7.0 (**Fig. S5**). In contrast, at lower pH ( $<$  6.0), cholic acid precipitates out from NaCh solution ( $\text{pK}_{\text{a}} \sim$  5).<sup>2</sup> Therefore, buffer (30 mM NaCh + 20 mM HEPES, pH 6.9) was used instead of 30 mM NaCh solution to dilute the stock solutions of **1** and **2** prepared in DMSO.

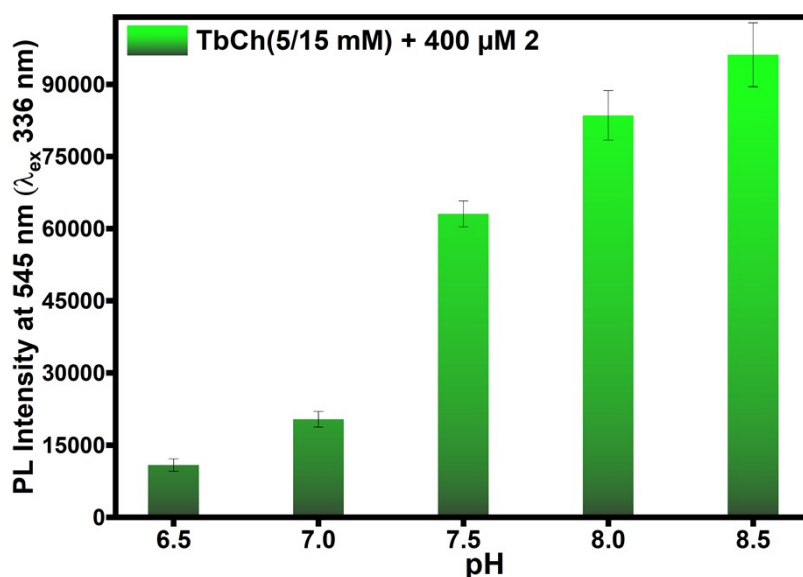

**Figure S5.** PL intensity at 545 nm ( $\lambda_{\text{ex}}$  336 nm) of 2-doped TbCh gels prepared from the preincubated 2-doped buffer (20 mM NaCh + 10 mM HEPES, 20% DMSO) solutions of various pH.

**Other organic solvents as assay media.** Further, the stock solutions of **2** in dioxane, ethanol, and DMSO were prepared and diluted in the buffer solution (pH 6.9, 20% organic solvent, v/v). In the optimized assay conditions, fluoride detection assay was performed using these solutions of *pro*-sensitizer **2**. Similar Tb<sup>3+</sup> luminescence enhancement for fluoride-treated **2**-doped TbCh gel to control (**2**-doped TbCh) compared to 20% DMSO/water was also observed for 20% dioxane/water and 20% ethanol/water (Fig. S6).

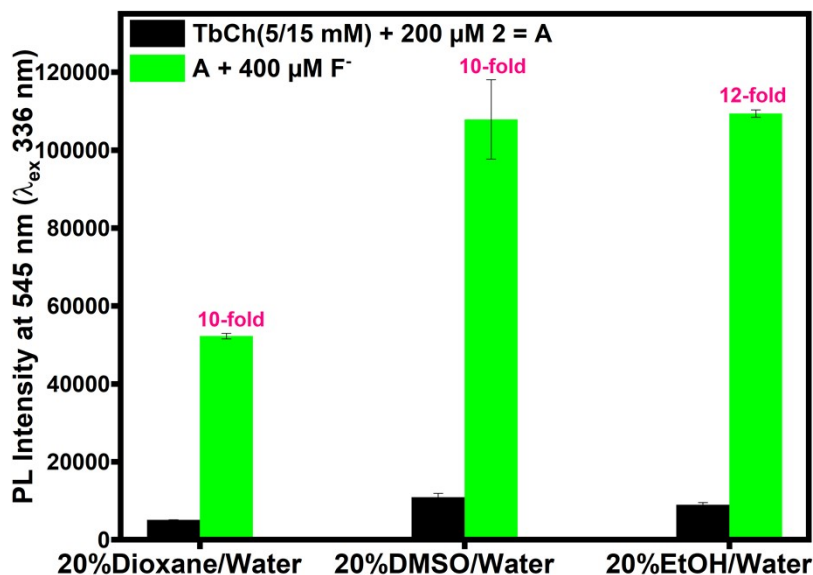

**Figure S6.** PL intensity at 545 nm (λ<sub>ex</sub> 336 nm) of TbCh gels prepared from the preincubated **2**-doped and fluoride-treated **2**-doped buffer (20 mM NaCl + 10 mM HEPES, 20% organic solvent, pH 6.9) solutions.

## S2. Reactivity of fluoride ions towards *pro*-sensitizers **2** versus **4**:

The fluoride detection assay was performed by incubating **2**-doped, fluoride-treated **2**-doped, **4**-doped and fluoride-treated **4**-doped buffer solutions at 35 °C for 2 h. There was no luminescence enhancement for fluoride-treated **4**-doped TbCh gel compared to the control (Fig. S7a). Then, a similar assay was performed by incubation at 45 °C for 2 h, where *pro*-sensitizer **4** showed only 2-fold luminescence enhancement compared to the control, whereas that of *pro*-sensitizer **2** was 5-fold (Fig. S7b).

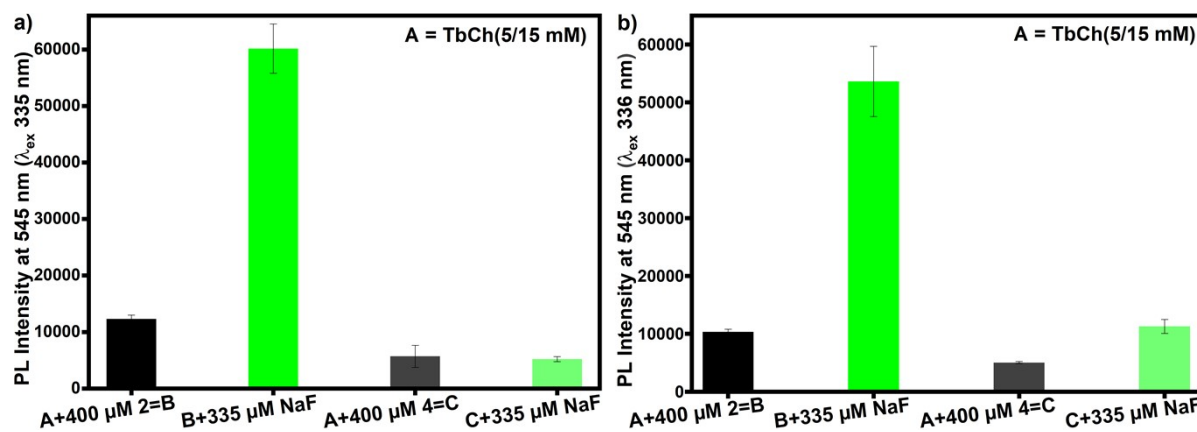

**Figure S7.** PL intensity at 545 nm (λ<sub>ex</sub> 336 nm) of TbCh gels prepared from preincubated **2**-doped, fluoride-treated **2**-doped, **4**-doped and fluoride-treated **4**-doped buffer solutions at **a)** 35 °C and **b)** 45 °C.

### S3. Comparison of PL intensity and HPLC peak area with incubation time:

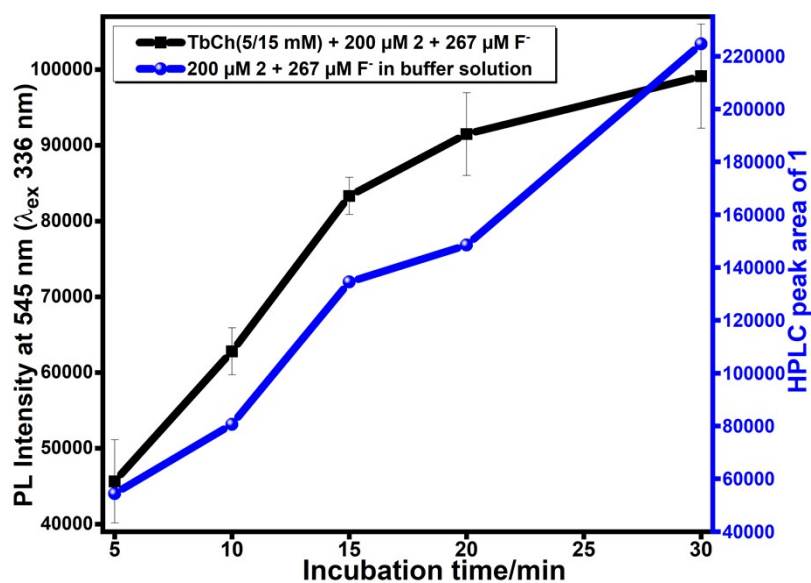

**Figure S8.** PL intensity at 545 nm ( $\lambda_{\text{ex}}$  336 nm) of TbCh gels prepared and HPLC peak area of released **1** from the preincubated fluoride-treated **2**-doped buffer (20 mM NaCh + 10 mM HEPES, 20% DMSO, pH 6.9) solutions.

### S4. Calculation of limit of detection (LOD) value:

**Data recorded in the Varian Cary Eclipse instrument (gels in cuvette):**

LOD was calculated using the following equation,

$$LOD = \frac{3 \times s}{b}$$

Where  $s$  is the intercept error for the PL intensity of gel, and  $b$  is the slope of the plot (**Fig. 6b**). The equation of linear fit is  $y = 4.8 \times x + 3.7$  ( $R^2 = 0.97953$ ).

Where  $y$  is the PL intensity of the gel samples at 545 nm, and  $x$  is the fluoride concentration. So,

$$LOD = \frac{3 \times 3.7}{4.8} \mu\text{M} = 2.35 \mu\text{M}$$

Similarly, the LOD calculated from the other two identical experiments were 2.65  $\mu\text{M}$  and 2.58  $\mu\text{M}$ .

**Therefore, LOD = (2.5  $\pm$  0.2)  $\mu\text{M}$**

**Data recorded in the Plate Reader instrument (gel-coated paper discs):**

LOD was calculated using the following equation,

$$LOD = \frac{3 \times \sigma}{b}$$

Where  $\sigma$  is the standard deviation for the PL intensities of gel-coated paper discs without fluoride, and  $b$  is the slope of the plot (**Fig. 7b**). The equation of linear fit is  $y = 607 \times x + 16454$  ( $R^2 = 0.99963$ ).

Where  $y$  is the PL intensity of the gel samples at 545 nm, and  $x$  is the fluoride concentration. So,

$$LOD = \frac{3 \times 292}{607} \mu\text{M} = 1.4 \mu\text{M}$$

**LOD = 1.4  $\times$  19 ppb = 27 ppb**

**Table S1.** Comparison table of LOD value with recently reported literature.

| S. No. | Probe                                                                                                                                        | Solvent                                              | Assay time    | Method                                                | LOD           | Reference                                                                     |
|--------|----------------------------------------------------------------------------------------------------------------------------------------------|------------------------------------------------------|---------------|-------------------------------------------------------|---------------|-------------------------------------------------------------------------------|
| 1.     | 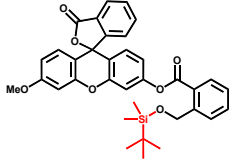                                                            | DMSO                                                 | 7 min         | Fluorescence<br>(turn-on)                             | 19.6 ppb      | <i>Chem. Commun.</i> 2014, <b>50</b> , 5510–5513.                             |
| 2.     |                                                             | DMSO:water<br>(3:1, v/v)                             | 2 min         | Ratiometric<br>Fluorescence                           | 2.6 ppb       | <i>ACS Omega</i> 2019, <b>4</b> , 4918–4926.                                  |
| 3.     |                                                             | EtOH:HEPES<br>buffer (50 mM,<br>pH 7.4, 1:1,<br>v/v) | 4 h           | Fluorescence<br>(turn-on)                             | 1.3 ppb       | <i>Dyes and Pigm.</i> 2021, <b>188</b> , 109166.                              |
| 4.     | <b>Calcein + Eu<sup>3+</sup> in<br/>ZnCdSe/ZnS QDs</b><br> | Water                                                | 2 h           | Fluorescence<br>(turn-on)                             | 215 ppb       | <i>Anal. Bioanal. Chem.</i> 2022, <b>414</b> , 3999–4009.                     |
| 5.     |                                                           | EtOH:HEPES<br>buffer (50 mM,<br>pH 7.4, 8:2,<br>v/v) | 1 h           | Fluorescence<br>(turn-on)                             | 0.1 ppb       | <i>Spectrochim. Acta A Mol. Biomol. Spectrosc.</i> 2023, <b>285</b> , 121816. |
| 6.     |                                                           | Citrate buffer<br>aq. (0.1 M, pH<br>4.1)             | 1 h           | Fluorescence<br>(turn-on)                             | 11.4 ppb      | <i>Chem. Sci.</i> 2023, <b>14</b> , 291–297.                                  |
| 7.     | <b>PENG with fillers<br/>Mn-Doped<br/>BaTiO<sub>3</sub> Nanostruc<br/>tures and CNTs</b>                                                     | Piezoelectric<br>nanogenerator<br>(PENG)             | NA            | Output<br>voltage                                     | 22.4 ppb      | <i>ACS Appl. Nano Mater.</i> 2023, <b>6</b> , 6637–6652.                      |
| 8.     |                                                           | DMSO:HEPES<br>buffer (20 mM,<br>pH 6.5, 1:4,<br>v/v) | <b>30 min</b> | <b>Tb<sup>3+</sup><br/>luminescence<br/>(turn-on)</b> | <b>27 ppb</b> | <b>This work</b>                                                              |

Here, most of the methods have used organic solvents as a medium or compromised with low LOD.

## S5. Fluoride detection from real-life samples and calculations:

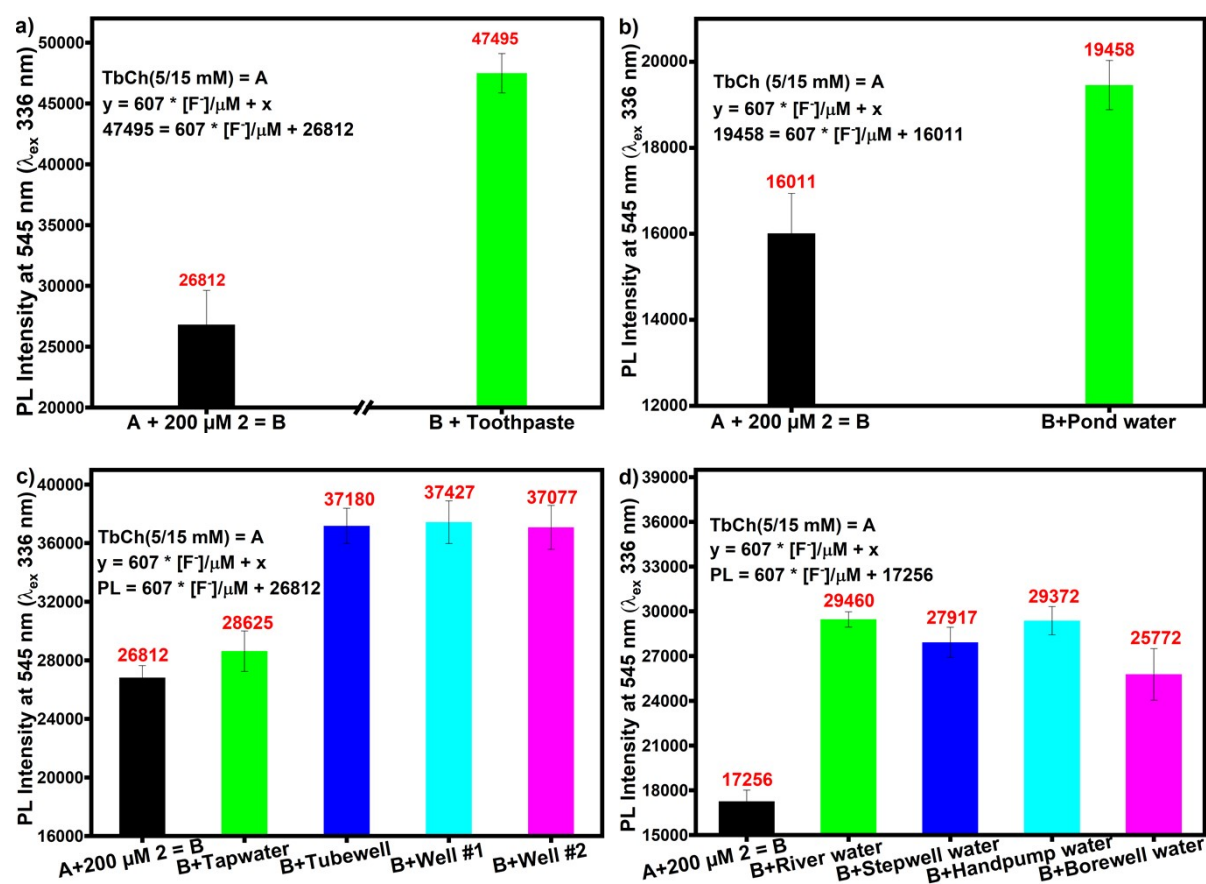

**Figure S9.** PL intensity at 545 nm ( $\lambda_{ex}$  336 nm) of TbCh gels prepared from the preincubated analyte-treated 2-doped buffer solutions; analyte: **a)** toothpaste solution; water samples from **b)** Bankura, West Bengal, **c)** Ajmer, Rajasthan, and **d)** Baran, Rajasthan.

### Calculations of fluoride content in the real-life samples (data from Fig. S9):

**Calculation for Fig. S8a:** The equation is as follows:

$$47495 = 607 \times [F^-]/\mu M + 26812$$

$$[F^-] = 34.1 \mu M$$

40  $\mu L$  of toothpaste solution was added to 260  $\mu L$  of probe solution during incubation. Therefore,

$$[F^-]_{TP} = (34.1 \mu M \times 300 \mu L)/40 \mu L = 256 \mu M$$

The fluoride content in the stock solution was 10 times that of the toothpaste solution as per dilution.

$$[F^-]_{Stock} = 256 \mu M \times 10 = 2560 \mu M$$

$$[F^-]_{Stock} = (2560 \mu mol/L) \times 19 \mu g/\mu mol$$

$$[F^-]_{Stock} = 48.64 \mu g/mL$$

Since the above stock solution was prepared by dissolving 476 mg in a 7.74 mL buffer solution, the fluoride content in the toothpaste pack:

$$[F^-]_{pack} = [(48.64 \mu g/mL \times 7.74 mL)/476 mg] \times 1000 ppm$$

$$[F^-]_{pack} = 791 ppm$$



**Calculation for Fig. S8b:** The equation is as follows:

$$19458 = 607 \times [F^-]/\mu\text{M} + 16011$$

$$[F^-] = 5.68 \mu\text{M}$$

40  $\mu\text{L}$  of toothpaste solution was added to 260  $\mu\text{L}$  of probe solution during incubation. Therefore,

$$[F^-]_{\text{Pond}} = (5.68 \mu\text{M} \times 300 \mu\text{L})/40 \mu\text{L} = 42.6 \mu\text{M}$$

$$[F^-]_{\text{Pond}} = (42.6 \mu\text{mol/L} \times 19 \mu\text{g}/\mu\text{mol})/1000 \text{ ppm}$$

$$[F^-]_{\text{Pond}} = \mathbf{0.81 \text{ ppm}}$$

**Calculation for Fig. S8c:** The equation is as follows:

$$\text{PL Intensity} = 607 \times [F^-]/\mu\text{M} + 26812$$

For tap water sample,

$$28625 = 607 \times [F^-]/\mu\text{M} + 26812$$

$$[F^-] = 2.99 \mu\text{M}$$

40  $\mu\text{L}$  of toothpaste solution was added to 260  $\mu\text{L}$  of probe solution during incubation. Therefore,

$$[F^-]_{\text{Tap}} = (2.99 \mu\text{M} \times 300 \mu\text{L})/40 \mu\text{L} = 22.4 \mu\text{M}$$

$$[F^-]_{\text{Tap}} = (22.4 \mu\text{mol/L} \times 19 \mu\text{g}/\mu\text{mol})/1000 \text{ ppm}$$

$$[F^-]_{\text{Tap}} = \mathbf{0.43 \text{ ppm}}$$

Similarly, for other samples,

$$[F^-]_{\text{Tubewell}} = \mathbf{2.44 \text{ ppm}}$$

$$[F^-]_{\text{Well\#1}} = \mathbf{2.49 \text{ ppm}}$$

$$[F^-]_{\text{Well\#2}} = \mathbf{2.41 \text{ ppm}}$$

**Calculation for Fig. S8d:** The equation is as follows:

$$\text{PL Intensity} = 607 \times [F^-]/\mu\text{M} + 17256$$

For the river water sample,

$$29460 = 607 \times [F^-]/\mu\text{M} + 17256$$

$$[F^-] = 20.1 \mu\text{M}$$

80  $\mu\text{L}$  of toothpaste solution was added to 220  $\mu\text{L}$  of probe solution during incubation. Therefore,

$$[F^-]_{\text{River}} = (20.1 \mu\text{M} \times 300 \mu\text{L})/80 \mu\text{L} = 75.3 \mu\text{M}$$

$$[F^-]_{\text{River}} = (75.3 \mu\text{mol/L} \times 19 \mu\text{g}/\mu\text{mol})/1000 \text{ ppm}$$

$$[F^-]_{\text{River}} = \mathbf{1.43 \text{ ppm}}$$

Similarly, for other samples,

$$[F^-]_{\text{Stepwell}} = \mathbf{1.24 \text{ ppm}}$$

$$[F^-]_{\text{Handpump}} = \mathbf{1.42 \text{ ppm}}$$

$$[F^-]_{\text{Borewell}} = \mathbf{1.00 \text{ ppm}}$$

## S6. %Recovery calculations from spike and recovery test:

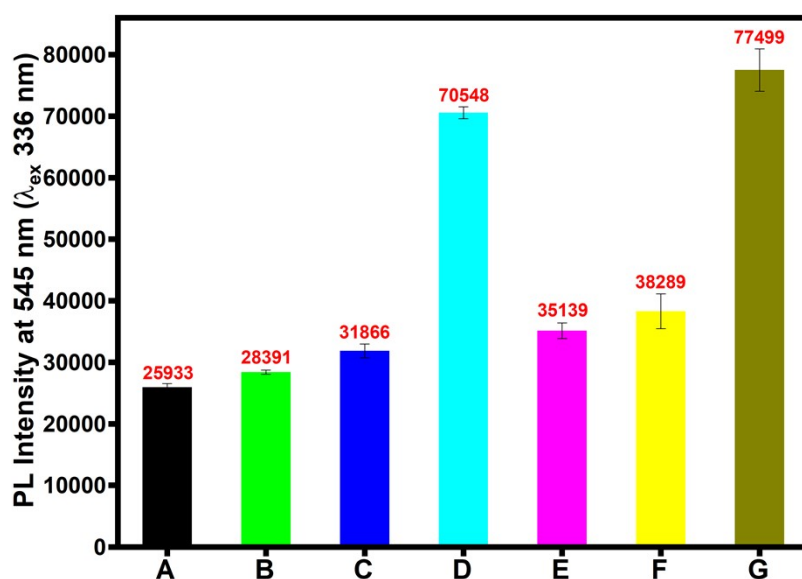

**Figure S10.** PL intensity at 545 nm ( $\lambda_{\text{ex}}$  336 nm) of TbCh gels prepared from the preincubated samples of fluoride-containing sample-treated 2-doped buffer solutions.

### Calculation of %recovery from spike & recovery experiment:

The equation of the calibration plot (linear fit) obtained from gel-coated paper discs is,

$$y = 607 * x + 25933$$

Where y is the PL intensity of the gel samples at 545 nm ( $\lambda_{\text{ex}}$  336 nm), and x is the concentration of fluoride ions. The sample A (2-doped TbCh gel) was the control.

The fluoride concentrations were calculated using the spike & recovery data (**Fig. S10**) of unspiked samples (**B, C, D**) and spiked (**E, F, G**) utilizing the above equation:

For sample **B**,

$$28391 = 607 * [\text{F}^-] + 25933$$

$$[\text{F}^-] = 4.1 \mu\text{M} = 4.1 \times 19 \text{ ppb} = 77.9 \text{ ppb}$$

For sample **C**,

$$31866 = 607 * [\text{F}^-] + 25933$$

$$[\text{F}^-] = 9.8 \mu\text{M} = 9.8 \times 19 \text{ ppb} = 186.2 \text{ ppb}$$

For sample **D**,

$$70548 = 607 * [\text{F}^-] + 25933$$

$$[\text{F}^-] = 73.5 \mu\text{M} = 73.5 \times 19 \text{ ppb} = 1396.5 \text{ ppb}$$

For sample **E**,

$$35139 = 607 * [\text{F}^-] + 25933$$

$$[\text{F}^-] = 15.2 \mu\text{M} = 15.2 \times 19 \text{ ppb} = 288.8 \text{ ppb}$$

For sample **F**,

$$38289 = 607 * [F^-] + 16554$$

$$[F^-] = 20.3 \mu\text{M} = 20.3 \times 19 \text{ ppb} = 385.7 \text{ ppb}$$

For sample G,

$$77499 = 607 * [F^-] + 16554$$

$$[F^-] = 85.0 \mu\text{M} = 85.0 \times 19 \text{ ppb} = 1615.0 \text{ ppb}$$

Now, the calculation of %recovery was done using the following equation:

$$\%Recovery = \frac{\text{Fluoride conc. (spiked)} - \text{Fluoride conc. (unspiked)}}{\text{Fluoride conc. (spiked)}} \times 100\%$$

For sample River Water (Baran Rajasthan):

$$\%Recovery = \frac{15.2 \mu\text{M} - 4.1 \mu\text{M}}{10 \mu\text{M}} \times 100\% = 111\%$$

For sample 10  $\mu\text{M}$  NaF aqueous solution:

$$\%Recovery = \frac{20.3 \mu\text{M} - 9.8 \mu\text{M}}{10 \mu\text{M}} \times 100\% = 105\%$$

For sample toothpaste solution:

$$\%Recovery = \frac{85.0 \mu\text{M} - 73.5 \mu\text{M}}{10 \mu\text{M}} \times 100\% = 115\%$$

S7. <sup>1</sup>H NMR, <sup>13</sup>C NMR and HRMS spectra of 2, 3 and 4:

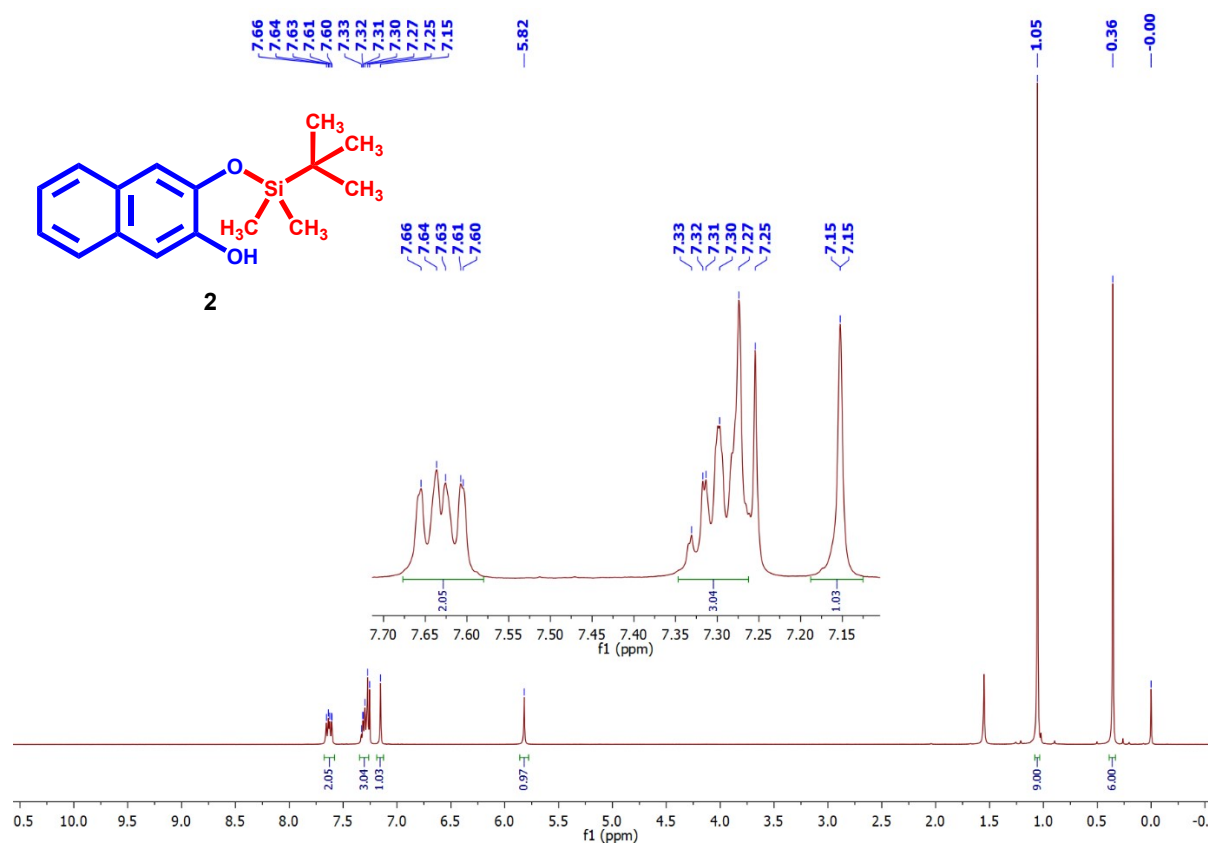

Figure S11. <sup>1</sup>H NMR spectrum of **2** in CDCl<sub>3</sub> solvent (400 MHz).

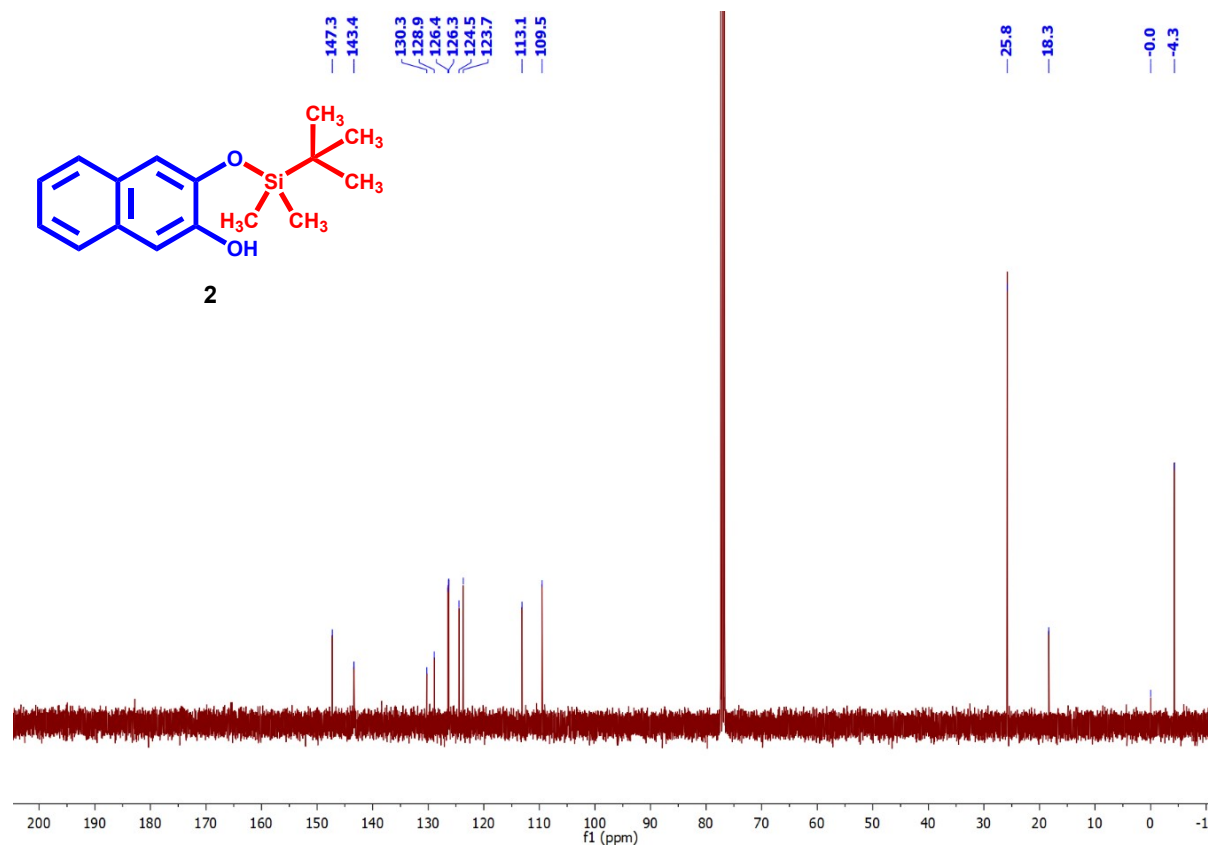

Figure S12. <sup>13</sup>C NMR spectrum of **2** in CDCl<sub>3</sub> solvent (100 MHz).

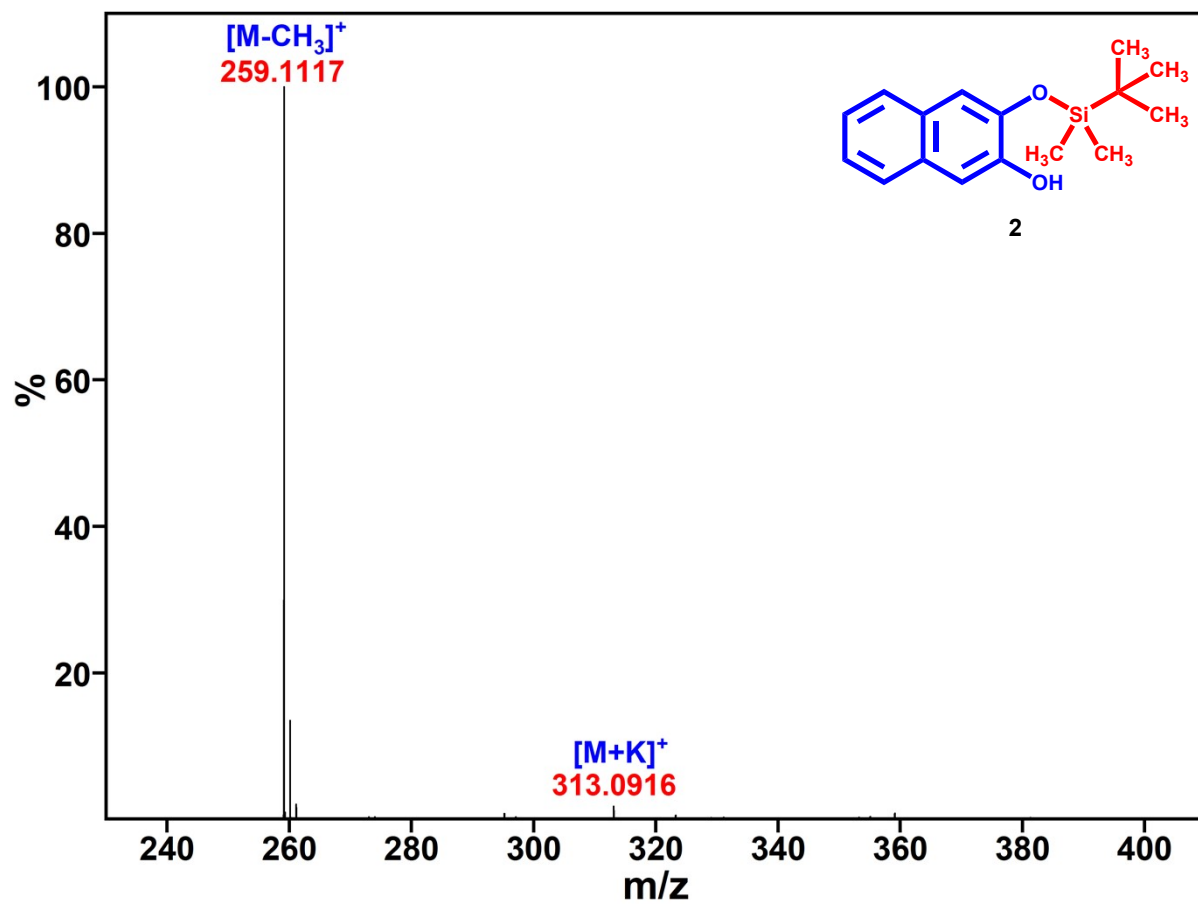

Figure S13. ESI-Mass spectrum of **2** in positive mode.

04-dec-2021.1043.fid

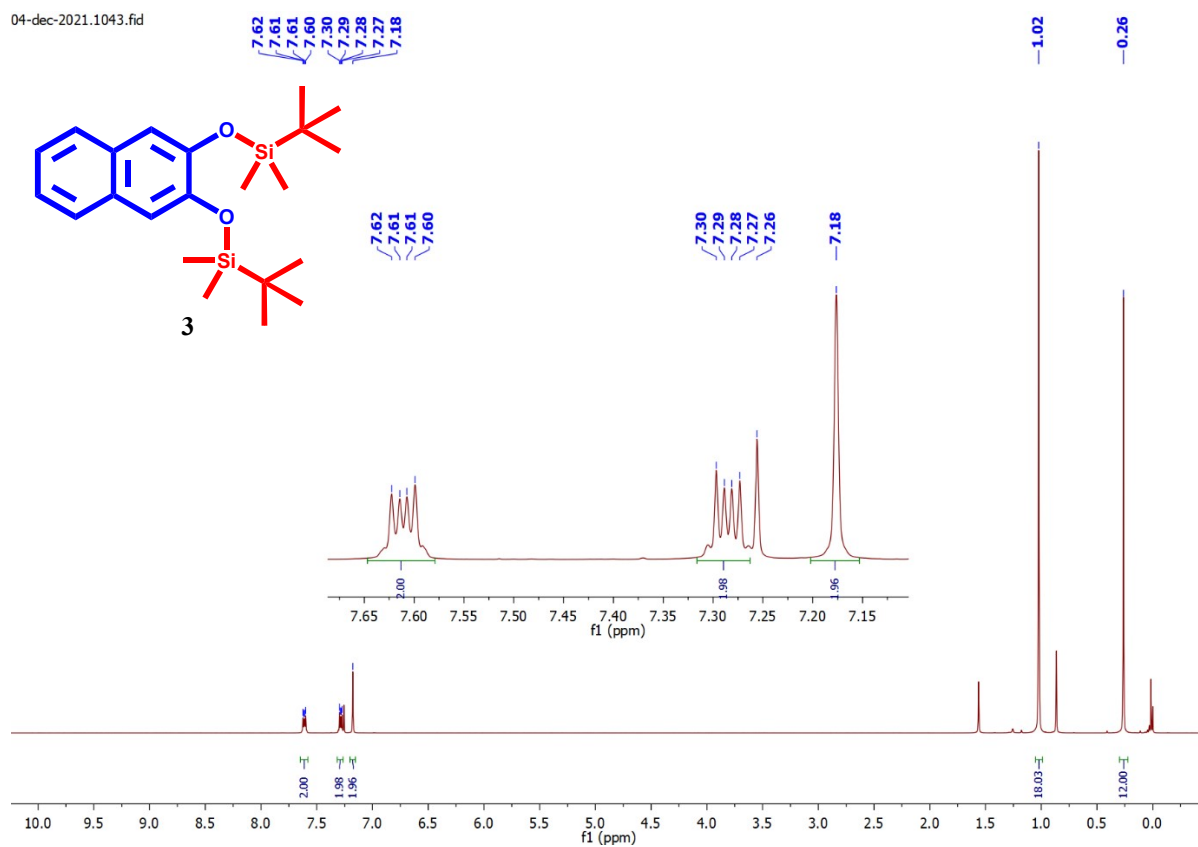

Figure S 14.  $^1\text{H}$  NMR spectrum of **3** in  $\text{CDCl}_3$  solvent (400 MHz).

04-dec-2021.1044.fid

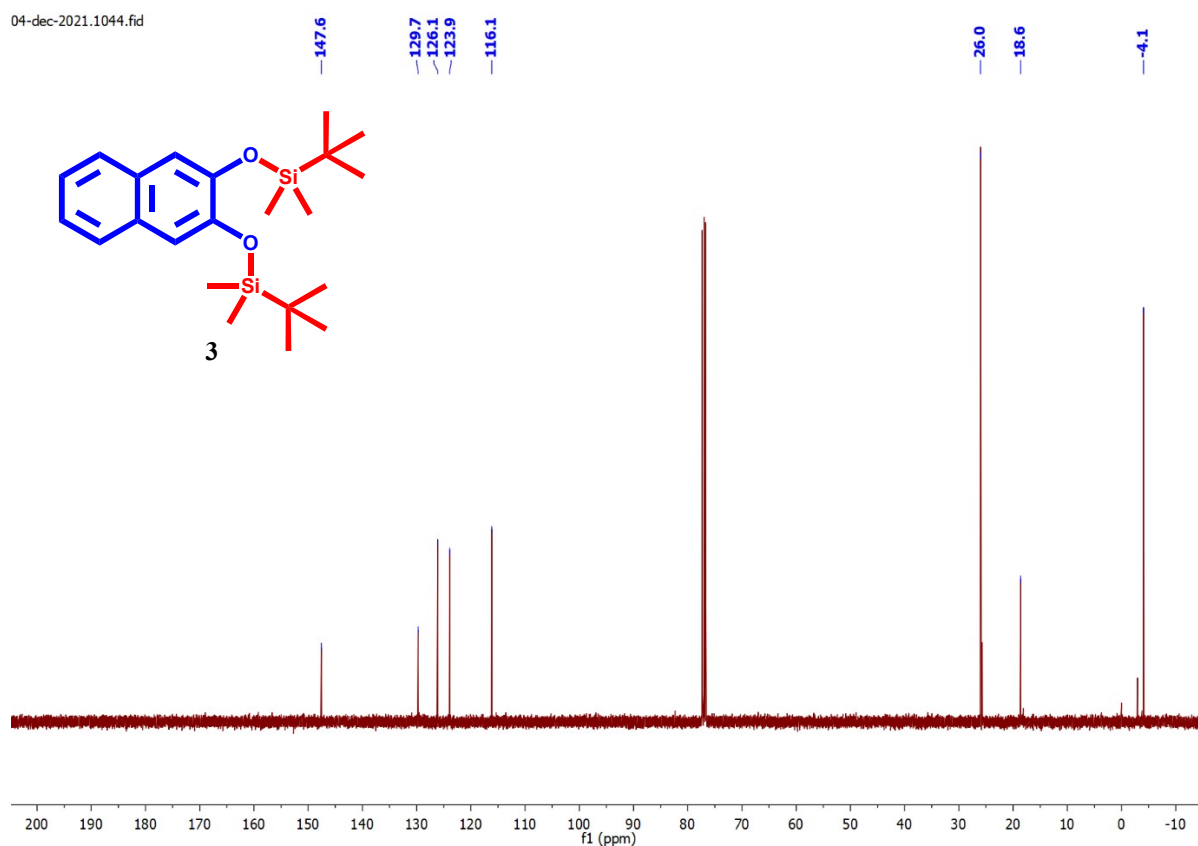

Figure S15.  $^{13}\text{C}$  NMR spectrum of **3** in  $\text{CDCl}_3$  solvent (100 MHz).

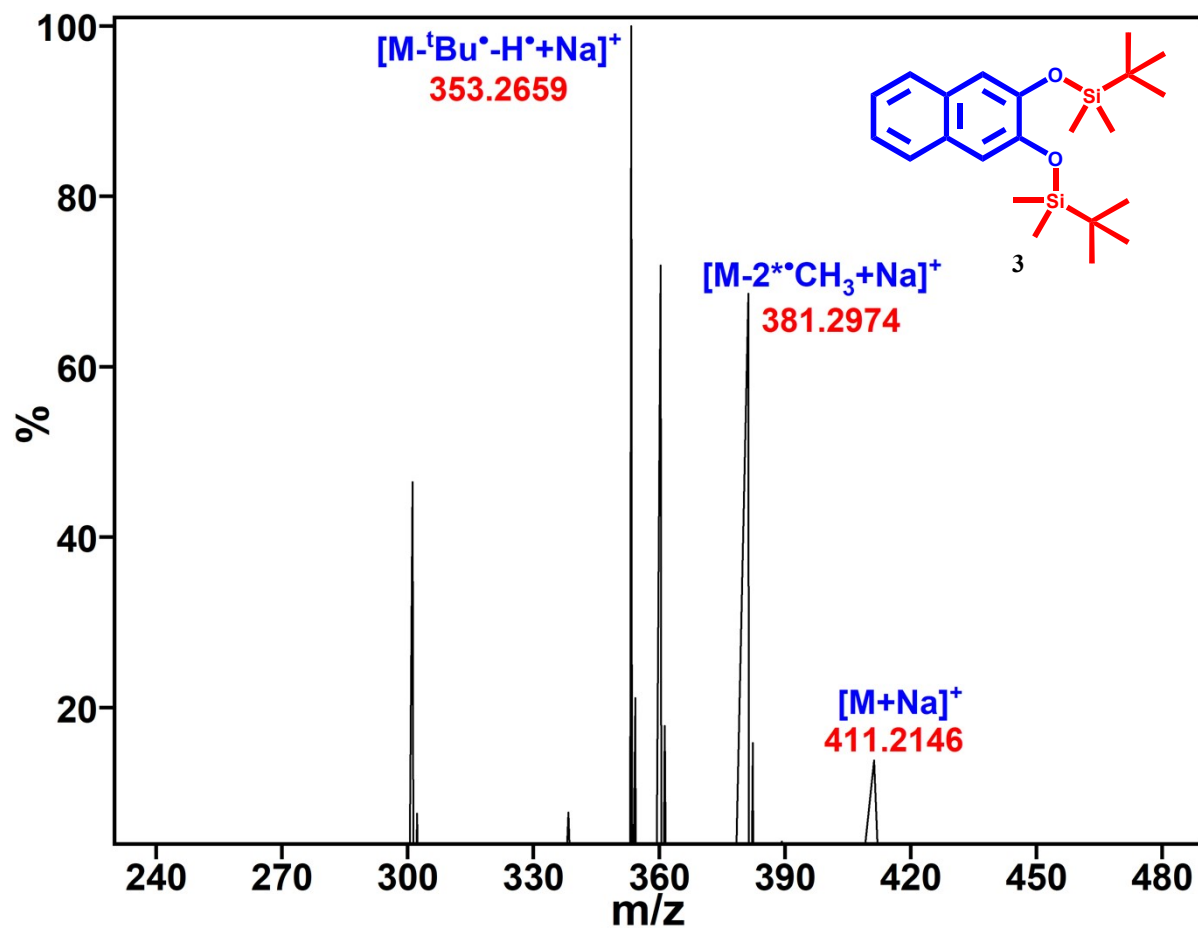

Figure S16. ESI-Mass spectrum of **3** in positive mode.

12-feb-2022.29.fid

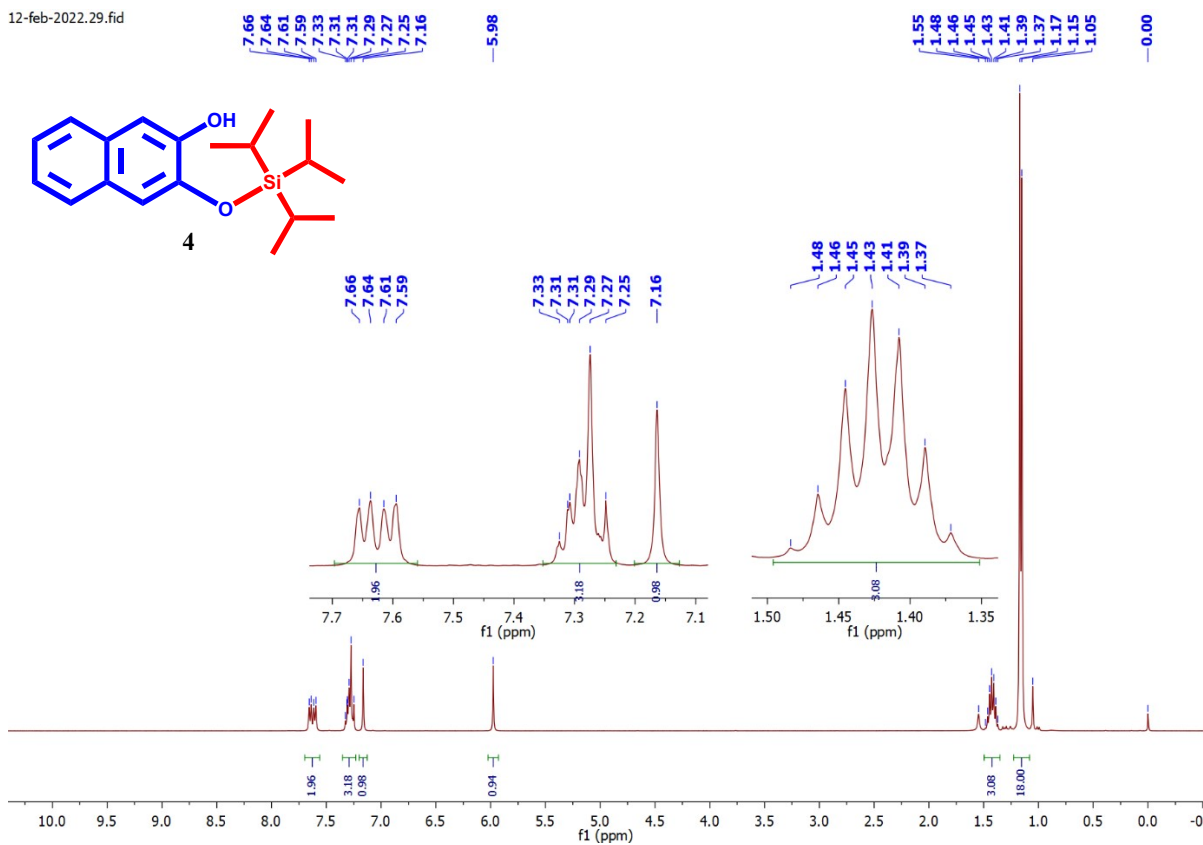

Figure S17. <sup>1</sup>H NMR spectrum of 4 in CDCl<sub>3</sub> solvent (400 MHz).

12-feb-2022.30.fid

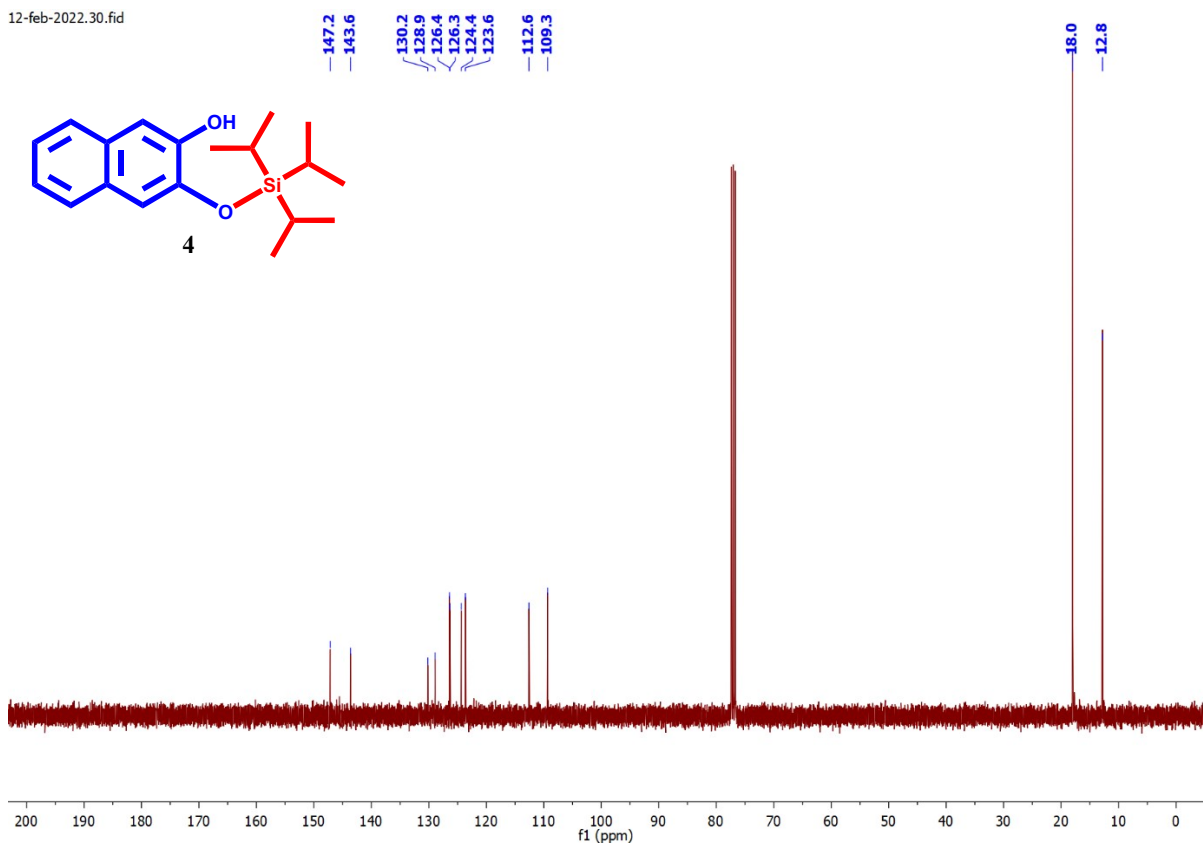

Figure S18. <sup>13</sup>C NMR spectrum of 4 in CDCl<sub>3</sub> solvent (100 MHz).



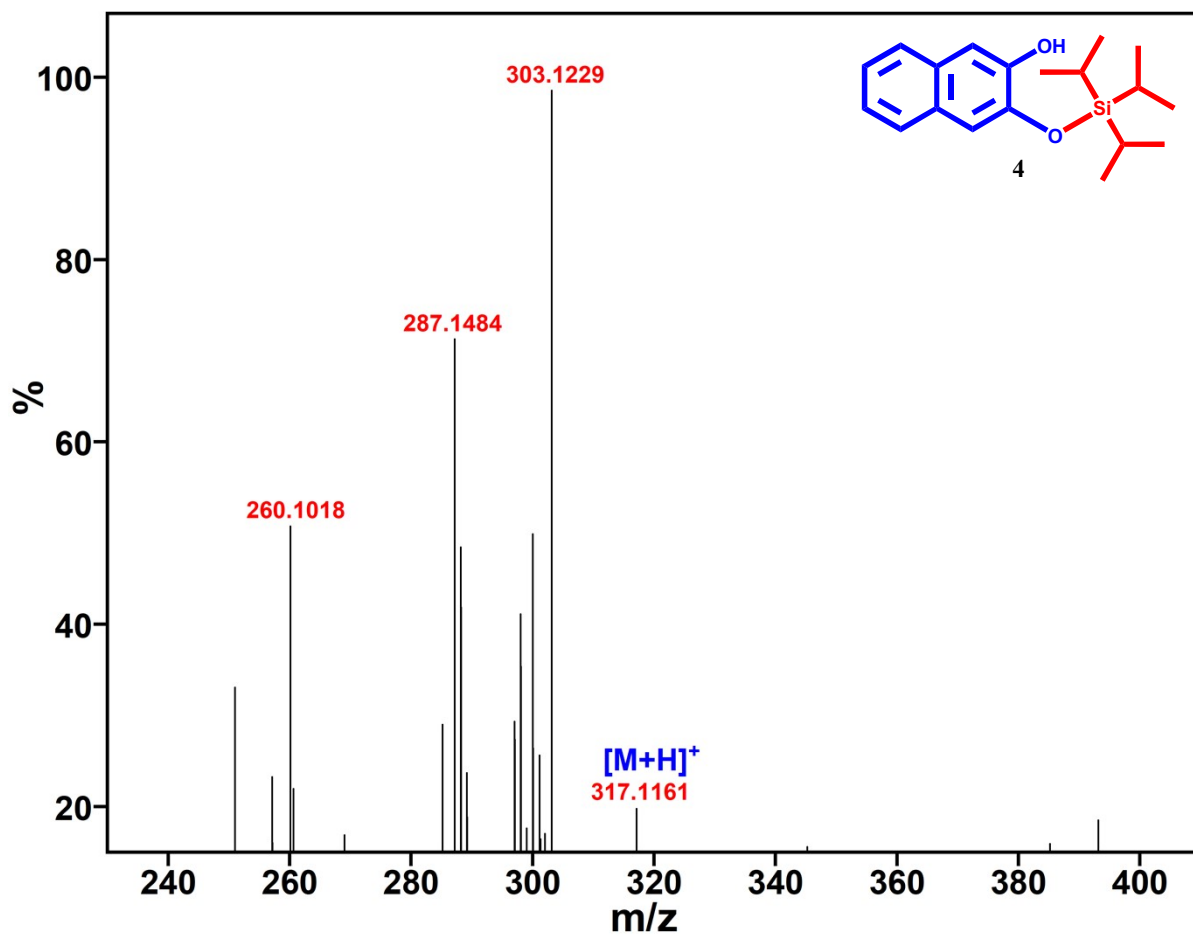

Figure S19. ESI-Mass spectrum of 4 in positive mode.

## S8. References:

1. Serjeant, E.P.; Dempsey, B. Ionisation constants of organic acids in aqueous solution. *IUPAC Chem. Data Ser. No. 23*. NY, NY: Pergamon 1979, **989**.
